# Supplementary material for: Antimicrobial resistance transmission in the environmental settings through Traditional and UV-Enabled Advanced Wastewater Treatment Plants: A metagenomic insight
Source: Research Square preprint supplement (doi:10.21203/rs.3.rs-4736119/v1), 2024-08-21
Supplement: Supplementary file 1 [file 815d817e9404ae7777c91723.xlsx]

## Sheet: Sample site information
Sample	Collection Date	Location (in degrees)	Time (IST)
WWTP-1	2021-12-21	Latitude: 27.920388, Longitude: 78.060335	02:23PM
WWTP-2	2021-12-21	Latitude: 27.920392, Longitude: 78.060228	02:29PM
WWTP-3	2021-12-21	Latitude: 27.920308, Longitude: 78.060112	02:40PM
WWTP-4	2021-12-21	Latitude: 27.92023, Longitude: 78.060422	02:57PM
WWTP-5	2021-12-21	Latitude: 27.920891, Longitude: 78.060573	03:29PM
WWTP-6	2021-12-21	Latitude: 27.921588, Longitude: 78.061008	03:34PM
WWTP-7	2021-12-21	Latitude: 27.92158, Longitude: 78.061052	03:40PM

## Sheet: Reads classification
Sample	Number of raw reads	Classified reads	Chordate reads	Artificial reads	Unclassified reads	Microbial reads	Bacterial reads	Viral reads	Fungal reads	Protozoan reads
WWTP-1	28649698	0.777	0	0	0.223	0.777	0.777	0	0	0
WWTP-2	29926405	0.805	0	0	0.195	0.805	0.805	0	0	0
WWTP-3	23165721	0.758	0	0	0.242	0.758	0.758	0	0	0
WWTP-4	16965838	0.673	0	0	0.327	0.673	0.673	0	0	0
WWTP-5	24339010	0.695	0	0	0.305	0.695	0.695	0	0	0
WWTP-6	30391518	0.737	0	0	0.263	0.737	0.737	0	0	0
WWTP-7	12736921	0.705	0	0	0.295	0.705	0.705	0	0	0

## Sheet: Microbiome_Alpha_diversity
Sample	Observed	Shannon	Simpson	InvSimpson
WWTP-1	10104	4.57008	0.938241	16.192
WWTP-2	10060	4.54965	0.945622	18.3899
WWTP-3	10070	4.76512	0.951368	20.5625
WWTP-4	10104	5.5248	0.975507	40.8275
WWTP-5	10133	5.60418	0.973157	37.2542
WWTP-6	10240	4.17169	0.875198	8.01271
WWTP-7	10046	4.81206	0.939297	16.4735

## Sheet: ARG_Shannon
Sample	Shannon
WWTP-1	3.96892
WWTP-2	2.28019
WWTP-3	0.976522
WWTP-4	2.43369
WWTP-5	3.76792
WWTP-6	0.83948
WWTP-7	0.819109

## Sheet: WWTP_1_ARG
	Contig_ID	Start	Stop	Contig_Length	Reads	RPKM	Best_Hit_ARO	Drug_Class	Resistance Mechanism	AMR Gene Family
1	k141_101915	21523	22155	633	4798	606.523	CRP	macrolide antibiotic; fluoroquinolone antibiotic; penam	antibiotic efflux	resistance-nodulation-cell division (RND) antibiotic efflux pump
2	k141_10372	4781	5641	861	3797	352.881	AAC(3)-IId	aminoglycoside antibiotic	antibiotic inactivation	AAC(3)
3	k141_104151	242	1456	1215	240	15.8061	cmlA9	phenicol antibiotic	antibiotic efflux	major facilitator superfamily (MFS) antibiotic efflux pump
4	k141_118565	3421	4590	1170	1044	71.4011	Escherichia coli EF-Tu mutants conferring resistance to Pulvomycin	elfamycin antibiotic	antibiotic target alteration	elfamycin resistant EF-Tu
5	k141_121058	520	1089	570	1547	217.173	dfrA19	diaminopyrimidine antibiotic	antibiotic target replacement	trimethoprim resistant dihydrofolate reductase dfr
6	k141_132086	532	1323	792	332	33.5431	ANT(3'')-IIa	aminoglycoside antibiotic	antibiotic inactivation	ANT(3'')
7	k141_133435	1	1548	1548	158	8.16726	tet(M)	tetracycline antibiotic	antibiotic target protection	tetracycline-resistant ribosomal protection protein
8	k141_134585	182	1012	831	286	27.5395	OXA-235	carbapenem; cephalosporin; penam	antibiotic inactivation	OXA beta-lactamase
9	k141_138355	1284	2465	1182	526	35.6089	tet(H)	tetracycline antibiotic	antibiotic efflux	major facilitator superfamily (MFS) antibiotic efflux pump
10	k141_138389	599	1498	900	276	24.539	VEB-9	monobactam; cephalosporin	antibiotic inactivation	VEB beta-lactamase
11	k141_152904	1203	2066	864	305	28.2473	ANT(6)-Ia	aminoglycoside antibiotic	antibiotic inactivation	ANT(6)
12	k141_164699	557	1381	825	137	13.2879	ErmF	macrolide antibiotic; lincosamide antibiotic; streptogramin antibiotic; streptogramin A antibiotic; streptogramin B antibiotic	antibiotic target alteration	Erm 23S ribosomal RNA methyltransferase
13	k141_176015	820	1707	888	4091	368.644	mphG	macrolide antibiotic	antibiotic inactivation	macrolide phosphotransferase (MPH)
14	k141_180589	1812	2738	927	932	80.4501	PER-7	monobactam; carbapenem; cephalosporin; penam; penem	antibiotic inactivation	PER beta-lactamase
15	k141_18076	10257	10709	453	5544	979.299	arr-3	rifamycin antibiotic	antibiotic inactivation	rifampin ADP-ribosyltransferase (Arr)
16	k141_187850	930	1463	534	420	62.9359	ANT(2'')-Ia	aminoglycoside antibiotic	antibiotic inactivation	ANT(2'')
17	k141_19261	1067	1966	900	1521	135.231	mphF	macrolide antibiotic	antibiotic inactivation	macrolide phosphotransferase (MPH)
18	k141_193766	168	626	459	160	27.8932	AAC(6')-Il	aminoglycoside antibiotic	antibiotic inactivation	AAC(6')
19	k141_198559	152	955	804	193	19.2084	lnuG	lincosamide antibiotic	antibiotic inactivation	lincosamide nucleotidyltransferase (LNU)
20	k141_204929	259	1122	864	451	41.7689	aadS	aminoglycoside antibiotic	antibiotic inactivation	ANT(6)
21	k141_21338	291	902	612	48	6.27596	QnrB4	fluoroquinolone antibiotic	antibiotic target protection	quinolone resistance protein (qnr)
22	k141_223939	584	1423	840	6572	626.05	sul1	sulfonamide antibiotic	antibiotic target replacement	sulfonamide resistant sul
23	k141_223939	243	590	348	6572	1511.15	qacEdelta1	disinfecting agents and antiseptics	antibiotic efflux	major facilitator superfamily (MFS) antibiotic efflux pump
24	k141_225700	2826	4013	1188	9586	645.671	tet(39)	tetracycline antibiotic	antibiotic efflux	major facilitator superfamily (MFS) antibiotic efflux pump
25	k141_231456	159	1385	1227	514	33.5204	EreD	macrolide antibiotic	antibiotic inactivation	macrolide esterase
26	k141_246848	298	1113	816	3687	361.554	sul2	sulfonamide antibiotic	antibiotic target replacement	sulfonamide resistant sul
27	k141_250760	1151	1939	789	608	61.6619	aadA27	aminoglycoside antibiotic	antibiotic inactivation	ANT(3'')
28	k141_250798	67	888	822	550	53.5404	OXA-134	carbapenem; cephalosporin; penam	antibiotic inactivation	OXA beta-lactamase
29	k141_255098	961	1872	912	392	34.3939	vanY gene in vanA cluster	glycopeptide antibiotic	antibiotic target alteration	vanY; glycopeptide resistance gene cluster
30	k141_255098	2914	3750	837	392	37.4758	vanA	glycopeptide antibiotic	antibiotic target alteration	glycopeptide resistance gene cluster; Van ligase
31	k141_255098	323	808	486	392	64.5417	vanZ gene in vanA cluster	glycopeptide antibiotic	antibiotic target alteration	vanZ; glycopeptide resistance gene cluster
32	k141_255098	2300	2908	609	392	51.5062	vanX gene in vanA cluster	glycopeptide antibiotic	antibiotic target alteration	vanX; glycopeptide resistance gene cluster
33	k141_256238	359	1171	813	6443	634.144	NDM-1	carbapenem; cephalosporin; cephamycin; penam	antibiotic inactivation	NDM beta-lactamase
34	k141_256238	1175	1540	366	6443	1408.63	BRP(MBL)	glycopeptide antibiotic	antibiotic inactivation	Bleomycin resistant protein
35	k141_257960	1395	4532	3138	2326	59.3126	AxyY	macrolide antibiotic; fluoroquinolone antibiotic; aminoglycoside antibiotic; cephalosporin	antibiotic efflux	resistance-nodulation-cell division (RND) antibiotic efflux pump
36	k141_27225	89	643	555	86	12.3993	AAC(6')-IIa	aminoglycoside antibiotic	antibiotic inactivation	AAC(6')
37	k141_280968	2	661	660	250	30.31	vanR gene in vanA cluster	glycopeptide antibiotic	antibiotic target alteration	glycopeptide resistance gene cluster; vanR
38	k141_280968	651	1793	1143	250	17.5019	vanS gene in vanA cluster	glycopeptide antibiotic	antibiotic target alteration	vanS; glycopeptide resistance gene cluster
39	k141_29641	712	1185	474	363	61.28	dfrA1	diaminopyrimidine antibiotic	antibiotic target replacement	trimethoprim resistant dihydrofolate reductase dfr
40	k141_29665	241	1050	810	127	12.5461	aadA3	aminoglycoside antibiotic	antibiotic inactivation	ANT(3'')
41	k141_35615	166	1026	861	809	75.1858	KBL-1	penam	antibiotic inactivation	KBL beta-lactamase
42	k141_49565	1022	1819	798	5040	505.38	OXA-48	carbapenem; cephalosporin; penam	antibiotic inactivation	OXA beta-lactamase
43	k141_52720	1773	2105	333	639	153.549	qacL	disinfecting agents and antiseptics	antibiotic efflux	small multidrug resistance (SMR) antibiotic efflux pump
44	k141_53713	1829	3028	1200	702	46.8108	tet(A)	tetracycline antibiotic	antibiotic efflux	major facilitator superfamily (MFS) antibiotic efflux pump
45	k141_55717	601	1491	891	328	29.4569	mphN	macrolide antibiotic	antibiotic inactivation	macrolide phosphotransferase (MPH)
46	k141_59358	2039	2923	885	20863	1886.36	mphE	macrolide antibiotic	antibiotic inactivation	macrolide phosphotransferase (MPH)
47	k141_59358	508	1983	1476	20863	1131.05	msrE	macrolide antibiotic; streptogramin antibiotic	antibiotic target protection	msr-type ABC-F protein
48	k141_63040	119	922	804	204	20.3032	lnuB	lincosamide antibiotic	antibiotic inactivation	lincosamide nucleotidyltransferase (LNU)
49	k141_63283	301	936	636	939	118.141	AAC(6')-Ib9	aminoglycoside antibiotic	antibiotic inactivation	AAC(6')
50	k141_64779	196	1335	1140	128	8.98453	DHA-1	cephalosporin; cephamycin	antibiotic inactivation	DHA beta-lactamase
51	k141_68892	117	569	453	79	13.9547	dfrG	diaminopyrimidine antibiotic	antibiotic target replacement	trimethoprim resistant dihydrofolate reductase dfr
52	k141_71587	43	879	837	10884	1040.53	APH(6)-Id	aminoglycoside antibiotic	antibiotic inactivation	APH(6)
53	k141_71587	879	1682	804	10884	1083.24	APH(3'')-Ib	aminoglycoside antibiotic	antibiotic inactivation	APH(3'')
54	k141_73242	889	1689	801	318	31.7676	OXA-10	carbapenem; cephalosporin; penam	antibiotic inactivation	OXA beta-lactamase
55	k141_80227	1095	1832	738	1936	209.913	ErmB	macrolide antibiotic; lincosamide antibiotic; streptogramin antibiotic; streptogramin A antibiotic; streptogramin B antibiotic	antibiotic target alteration	Erm 23S ribosomal RNA methyltransferase
56	k141_89537	2347	3561	1215	5812	382.772	floR	phenicol antibiotic	antibiotic efflux	major facilitator superfamily (MFS) antibiotic efflux pump
57	k141_91858	302	1198	897	526	46.9228	CARB-16	penam	antibiotic inactivation	CARB beta-lactamase
58	k141_92895	240	1400	1161	229	15.7832	tet(X)	glycylcycline; tetracycline antibiotic	antibiotic inactivation	tetracycline inactivation enzyme

## Sheet: WWTP_2_ARG
	Contig_ID	Start	Stop	Contig_Length	Reads	RPKM	Best_Hit_ARO	Drug_Class	Resistance Mechanism	AMR Gene Family
1	k141_10390	3	161	159	2418	1597.99	rsmA	fluoroquinolone antibiotic; diaminopyrimidine antibiotic; phenicol antibiotic	antibiotic efflux	resistance-nodulation-cell division (RND) antibiotic efflux pump
2	k141_115512	1	459	459	12	2.74715	SAT-2	nucleoside antibiotic	antibiotic inactivation	streptothricin acetyltransferase (SAT)
3	k141_115519	238	1017	780	1630	219.587	APH(3')-VI	aminoglycoside antibiotic	antibiotic inactivation	APH(3')
4	k141_125543	164	1027	864	133	16.1753	aadS	aminoglycoside antibiotic	antibiotic inactivation	ANT(6)
5	k141_12737	364	1578	1215	2285	197.617	floR	phenicol antibiotic	antibiotic efflux	major facilitator superfamily (MFS) antibiotic efflux pump
6	k141_12751	364	1578	1215	1648	142.526	floR	phenicol antibiotic	antibiotic efflux	major facilitator superfamily (MFS) antibiotic efflux pump
7	k141_133156	291	2210	1920	375	20.5232	tet(W)	tetracycline antibiotic	antibiotic target protection	tetracycline-resistant ribosomal protection protein
8	k141_156139	4273	4638	366	12614	3621.48	BRP(MBL)	glycopeptide antibiotic	antibiotic inactivation	Bleomycin resistant protein
9	k141_156139	4642	5454	813	12614	1630.33	NDM-1	carbapenem; cephalosporin; cephamycin; penam	antibiotic inactivation	NDM beta-lactamase
10	k141_15962	2	1042	1041	52	5.24888	mefF	macrolide antibiotic	antibiotic efflux	major facilitator superfamily (MFS) antibiotic efflux pump
11	k141_166612	1417	2221	805	1428	186.4	lnuG	lincosamide antibiotic	antibiotic inactivation	lincosamide nucleotidyltransferase (LNU)
12	k141_169039	172	1071	900	1135	132.516	VEB-9	monobactam; cephalosporin	antibiotic inactivation	VEB beta-lactamase
13	k141_178263	1865	3304	1440	1011	73.7739	AAC(6')-Ie-APH(2'')-Ia bifunctional protein	aminoglycoside antibiotic	antibiotic inactivation	APH(2''); AAC(6')
14	k141_179245	177403	178200	798	411710	54212.9	aadA7	aminoglycoside antibiotic	antibiotic inactivation	ANT(3'')
15	k141_179245	178274	178606	333	411710	129916	qacL	disinfecting agents and antiseptics	antibiotic efflux	small multidrug resistance (SMR) antibiotic efflux pump
16	k141_182886	1124	1732	609	417	71.9504	vanX gene in vanA cluster	glycopeptide antibiotic	antibiotic target alteration	vanX; glycopeptide resistance gene cluster
17	k141_182886	2762	3577	816	417	53.6982	vanH gene in vanA cluster	glycopeptide antibiotic	antibiotic target alteration	vanH; glycopeptide resistance gene cluster
18	k141_182886	1738	2769	1032	417	42.4591	vanA	glycopeptide antibiotic	antibiotic target alteration	glycopeptide resistance gene cluster; Van ligase
19	k141_193369	3	611	609	20	3.45086	catB3	phenicol antibiotic	antibiotic inactivation	chloramphenicol acetyltransferase (CAT)
20	k141_198134	1202	3121	1920	701	38.3646	tet(M)	tetracycline antibiotic	antibiotic target protection	tetracycline-resistant ribosomal protection protein
21	k141_19981	2479	3282	804	767	100.243	lnuB	lincosamide antibiotic	antibiotic inactivation	lincosamide nucleotidyltransferase (LNU)
22	k141_207316	3037	3924	888	6379	754.838	mphG	macrolide antibiotic	antibiotic inactivation	macrolide phosphotransferase (MPH)
23	k141_219079	687	1487	801	220	28.8605	ErmF	macrolide antibiotic; lincosamide antibiotic; streptogramin antibiotic; streptogramin A antibiotic; streptogramin B antibiotic	antibiotic target alteration	Erm 23S ribosomal RNA methyltransferase
24	k141_221714	296	781	486	88	19.0266	vanZ gene in vanA cluster	glycopeptide antibiotic	antibiotic target alteration	vanZ; glycopeptide resistance gene cluster
25	k141_235042	890	2065	1176	330	29.4863	cmx	phenicol antibiotic	antibiotic efflux	major facilitator superfamily (MFS) antibiotic efflux pump
26	k141_235692	25	864	840	2733	341.881	sul1	sulfonamide antibiotic	antibiotic target replacement	sulfonamide resistant sul
27	k141_235770	800	2014	1215	984	85.1007	cmlA9	phenicol antibiotic	antibiotic efflux	major facilitator superfamily (MFS) antibiotic efflux pump
28	k141_236136	1306	2487	1182	1070	95.1219	tet(H)	tetracycline antibiotic	antibiotic efflux	major facilitator superfamily (MFS) antibiotic efflux pump
29	k141_236201	4057	4794	738	842	119.886	ErmB	macrolide antibiotic; lincosamide antibiotic; streptogramin antibiotic; streptogramin A antibiotic; streptogramin B antibiotic	antibiotic target alteration	Erm 23S ribosomal RNA methyltransferase
30	k141_24328	5953	6837	885	19401	2303.54	mphE	macrolide antibiotic	antibiotic inactivation	macrolide phosphotransferase (MPH)
31	k141_24328	4422	5897	1476	19401	1381.19	msrE	macrolide antibiotic; streptogramin antibiotic	antibiotic target protection	msr-type ABC-F protein
32	k141_24398	1606	2592	987	845	89.9609	EreD	macrolide antibiotic	antibiotic inactivation	macrolide esterase
33	k141_251341	3	1145	1143	391	35.9455	Escherichia coli EF-Tu mutants conferring resistance to Pulvomycin	elfamycin antibiotic	antibiotic target alteration	elfamycin resistant EF-Tu
34	k141_256642	391	1125	735	74	10.5793	ErmT	macrolide antibiotic; lincosamide antibiotic; streptogramin antibiotic; streptogramin A antibiotic; streptogramin B antibiotic	antibiotic target alteration	Erm 23S ribosomal RNA methyltransferase
35	k141_287005	1834	2760	927	1182	133.984	PER-7	monobactam; carbapenem; cephalosporin; penam; penem	antibiotic inactivation	PER beta-lactamase
36	k141_287040	675	1244	570	679	125.173	dfrA19	diaminopyrimidine antibiotic	antibiotic target replacement	trimethoprim resistant dihydrofolate reductase dfr
37	k141_296498	76	900	825	206	26.2378	OXA-373	carbapenem; cephalosporin; penam	antibiotic inactivation	OXA beta-lactamase
38	k141_300949	3	1610	1608	233	15.2259	tet(M)	tetracycline antibiotic	antibiotic target protection	tetracycline-resistant ribosomal protection protein
39	k141_309291	298	1113	816	5322	685.329	sul2	sulfonamide antibiotic	antibiotic target replacement	sulfonamide resistant sul
40	k141_317389	8002	8862	861	6646	811.094	AAC(3)-IId	aminoglycoside antibiotic	antibiotic inactivation	AAC(3)
41	k141_329036	6335	7558	1224	18561	1593.43	mefC	macrolide antibiotic	antibiotic efflux	major facilitator superfamily (MFS) antibiotic efflux pump
42	k141_329036	7563	8447	885	18561	2203.8	mphG	macrolide antibiotic	antibiotic inactivation	macrolide phosphotransferase (MPH)
43	k141_335839	1129	1917	789	449	59.7976	aadA27	aminoglycoside antibiotic	antibiotic inactivation	ANT(3'')
44	k141_342222	2077	2967	891	1203	141.874	mphN	macrolide antibiotic	antibiotic inactivation	macrolide phosphotransferase (MPH)
45	k141_3710	773	1636	864	284	34.5397	ANT(6)-Ia	aminoglycoside antibiotic	antibiotic inactivation	ANT(6)
46	k141_38854	607	1140	534	817	160.766	ANT(2'')-Ia	aminoglycoside antibiotic	antibiotic inactivation	ANT(2'')
47	k141_38868	158	631	474	200	44.337	dfrA1	diaminopyrimidine antibiotic	antibiotic target replacement	trimethoprim resistant dihydrofolate reductase dfr
48	k141_41449	2	1027	1026	68	6.96427	tet(C)	tetracycline antibiotic	antibiotic efflux	major facilitator superfamily (MFS) antibiotic efflux pump
49	k141_43825	361	1503	1143	413	37.968	vanS gene in vanA cluster	glycopeptide antibiotic	antibiotic target alteration	vanS; glycopeptide resistance gene cluster
50	k141_43825	1493	2188	696	413	62.3527	vanR gene in vanA cluster	glycopeptide antibiotic	antibiotic target alteration	glycopeptide resistance gene cluster; vanR
51	k141_50329	301	855	555	99	18.7437	AAC(6')-IIa	aminoglycoside antibiotic	antibiotic inactivation	AAC(6')
52	k141_52755	1034	1693	660	384	61.1366	catQ	phenicol antibiotic	antibiotic inactivation	chloramphenicol acetyltransferase (CAT)
53	k141_55153	1423	2178	756	1927	267.839	ANT(4')-IIb	aminoglycoside antibiotic	antibiotic inactivation	ANT(4')
54	k141_64349	39	1313	1275	271	22.3343	tet(A)	tetracycline antibiotic	antibiotic efflux	major facilitator superfamily (MFS) antibiotic efflux pump
55	k141_70238	581	1078	498	388	81.8684	dfrG	diaminopyrimidine antibiotic	antibiotic target replacement	trimethoprim resistant dihydrofolate reductase dfr
56	k141_74313	44570	45277	708	43343	6432.8	EBR-3	carbapenem; cephalosporin; penam	antibiotic inactivation	EBR beta-lactamase
57	k141_77115	1819	2439	621	5215	882.423	AAC(6')-Ib9	aminoglycoside antibiotic	antibiotic inactivation	AAC(6')
58	k141_77115	1294	1746	453	5215	1209.68	arr-3	rifamycin antibiotic	antibiotic inactivation	rifampin ADP-ribosyltransferase (Arr)
59	k141_78997	43	822	780	361	48.6325	APH(3')-VIa	aminoglycoside antibiotic	antibiotic inactivation	APH(3')
60	k141_80077	1609	2496	888	5377	636.27	APH(3'')-Ib	aminoglycoside antibiotic	antibiotic inactivation	APH(3'')
61	k141_80077	2496	3332	837	5377	675.039	APH(6)-Id	aminoglycoside antibiotic	antibiotic inactivation	APH(6)
62	k141_80731	37772	38404	633	26319	4368.98	CRP	macrolide antibiotic; fluoroquinolone antibiotic; penam	antibiotic efflux	resistance-nodulation-cell division (RND) antibiotic efflux pump
63	k141_8193	209	886	678	150	23.2475	OXA-646	carbapenem; cephalosporin; penam	antibiotic inactivation	OXA beta-lactamase
64	k141_89728	2024	3211	1188	4761	421.11	tet(39)	tetracycline antibiotic	antibiotic efflux	major facilitator superfamily (MFS) antibiotic efflux pump
65	k141_91591	3558	4454	897	1143	133.896	CARB-16	penam	antibiotic inactivation	CARB beta-lactamase
66	k141_96654	1063	2490	1428	811	59.677	fexA	phenicol antibiotic	antibiotic efflux	major facilitator superfamily (MFS) antibiotic efflux pump
67	k141_97288	424	1239	816	1093	140.749	ANT(3'')-IIa	aminoglycoside antibiotic	antibiotic inactivation	ANT(3'')
68	k141_97288	2353	3009	657	1093	174.811	QnrVC1	fluoroquinolone antibiotic	antibiotic target protection	quinolone resistance protein (qnr)
69	k141_97288	1232	2032	801	1093	143.384	OXA-10	carbapenem; cephalosporin; penam	antibiotic inactivation	OXA beta-lactamase
70	k141_99535	2056	2955	900	3544	413.776	mphF	macrolide antibiotic	antibiotic inactivation	macrolide phosphotransferase (MPH)

## Sheet: WWTP_3_ARG
	Contig_ID	Start	Stop	Contig_Length	Reads	RPKM	Best_Hit_ARO	Drug_Class	Resistance Mechanism	AMR Gene Family
1	k141_110310	101	1294	1194	150	10.7349	mefF	macrolide antibiotic	antibiotic efflux	major facilitator superfamily (MFS) antibiotic efflux pump
2	k141_111255	7129	8343	1215	4071	286.309	floR	phenicol antibiotic	antibiotic efflux	major facilitator superfamily (MFS) antibiotic efflux pump
3	k141_114917	798	1988	1191	248	17.7931	tet(C)	tetracycline antibiotic	antibiotic efflux	major facilitator superfamily (MFS) antibiotic efflux pump
4	k141_119000	3426	4241	816	3848	402.954	sul2	sulfonamide antibiotic	antibiotic target replacement	sulfonamide resistant sul
5	k141_129851	444	902	459	121	22.526	AAC(6')-Il	aminoglycoside antibiotic	antibiotic inactivation	AAC(6')
6	k141_135853	152	1015	864	110	10.879	sul4	sulfonamide antibiotic	antibiotic target replacement	sulfonamide resistant sul
7	k141_143813	221	1051	831	1107	113.83	OXA-283	carbapenem; cephalosporin; penam	antibiotic inactivation	OXA beta-lactamase
8	k141_149449	281	1081	801	113	12.0547	ErmF	macrolide antibiotic; lincosamide antibiotic; streptogramin antibiotic; streptogramin A antibiotic; streptogramin B antibiotic	antibiotic target alteration	Erm 23S ribosomal RNA methyltransferase
9	k141_150799	153	605	453	633	119.403	arr-3	rifamycin antibiotic	antibiotic inactivation	rifampin ADP-ribosyltransferase (Arr)
10	k141_150799	678	1298	621	633	87.1009	AAC(6')-Ib9	aminoglycoside antibiotic	antibiotic inactivation	AAC(6')
11	k141_15120	3231	4091	861	1680	166.731	AAC(3)-IId	aminoglycoside antibiotic	antibiotic inactivation	AAC(3)
12	k141_160466	107	580	474	49	8.83341	dfrA16	diaminopyrimidine antibiotic	antibiotic target replacement	trimethoprim resistant dihydrofolate reductase dfr
13	k141_160961	242	1129	888	1982	190.722	mphG	macrolide antibiotic	antibiotic inactivation	macrolide phosphotransferase (MPH)
14	k141_170953	1	663	663	38	4.89757	OXA-140	carbapenem; cephalosporin; penam	antibiotic inactivation	OXA beta-lactamase
15	k141_18296	244289	245101	813	635714	66816.2	OXA-900	carbapenem; cephalosporin; penam	antibiotic inactivation	OXA beta-lactamase
16	k141_19365	1539	2342	804	827	87.8942	lnuG	lincosamide antibiotic	antibiotic inactivation	lincosamide nucleotidyltransferase (LNU)
17	k141_194282	296	1033	738	103	11.9259	ErmB	macrolide antibiotic; lincosamide antibiotic; streptogramin antibiotic; streptogramin A antibiotic; streptogramin B antibiotic	antibiotic target alteration	Erm 23S ribosomal RNA methyltransferase
18	k141_197842	2	289	288	8	2.3736	Klebsiella pneumoniae KpnF	macrolide antibiotic; aminoglycoside antibiotic; cephalosporin; tetracycline antibiotic; peptide antibiotic; rifamycin antibiotic; disinfecting agents and antiseptics	antibiotic efflux	major facilitator superfamily (MFS) antibiotic efflux pump
19	k141_199920	250	1113	864	1793	177.328	aadS	aminoglycoside antibiotic	antibiotic inactivation	ANT(6)
20	k141_214027	1826	3301	1476	13245	766.79	msrE	macrolide antibiotic; streptogramin antibiotic	antibiotic target protection	msr-type ABC-F protein
21	k141_214027	3357	4241	885	13245	1278.85	mphE	macrolide antibiotic	antibiotic inactivation	macrolide phosphotransferase (MPH)
22	k141_221859	161	1387	1227	2750	191.513	EreD	macrolide antibiotic	antibiotic inactivation	macrolide esterase
23	k141_224101	582	2021	1440	267	15.8438	AAC(6')-Ie-APH(2'')-Ia bifunctional protein	aminoglycoside antibiotic	antibiotic inactivation	APH(2''); AAC(6')
24	k141_228013	272	904	633	56	7.55953	CRP	macrolide antibiotic; fluoroquinolone antibiotic; penam	antibiotic efflux	resistance-nodulation-cell division (RND) antibiotic efflux pump
25	k141_247976	206	985	780	1951	213.734	ANT(3'')-IIa	aminoglycoside antibiotic	antibiotic inactivation	ANT(3'')
26	k141_247976	5160	6059	900	1951	185.236	VEB-9	monobactam; cephalosporin	antibiotic inactivation	VEB beta-lactamase
27	k141_24832	259	756	498	73	12.5258	dfrG	diaminopyrimidine antibiotic	antibiotic target replacement	trimethoprim resistant dihydrofolate reductase dfr
28	k141_256660	621	968	348	2672	656.097	qacEdelta1	disinfecting agents and antiseptics	antibiotic efflux	major facilitator superfamily (MFS) antibiotic efflux pump
29	k141_256660	962	1801	840	2672	271.812	sul1	sulfonamide antibiotic	antibiotic target replacement	sulfonamide resistant sul
30	k141_264445	110	1015	906	160	15.0905	mphA	macrolide antibiotic	antibiotic inactivation	macrolide phosphotransferase (MPH)
31	k141_274518	107	937	831	2496	256.658	APH(6)-Id	aminoglycoside antibiotic	antibiotic inactivation	APH(6)
32	k141_274518	943	1851	909	2496	234.634	APH(3'')-Ib	aminoglycoside antibiotic	antibiotic inactivation	APH(3'')
33	k141_3168	3	521	519	62	10.2079	AAC(6')-IIa	aminoglycoside antibiotic	antibiotic inactivation	AAC(6')
34	k141_3171	139	918	780	463	50.7221	APH(3')-VI	aminoglycoside antibiotic	antibiotic inactivation	APH(3')
35	k141_34071	2791	3618	828	2778	286.69	OXA-21	carbapenem; cephalosporin; penam	antibiotic inactivation	OXA beta-lactamase
36	k141_34071	3827	4627	801	2778	296.354	OXA-10	carbapenem; cephalosporin; penam	antibiotic inactivation	OXA beta-lactamase
37	k141_34071	4644	5177	534	2778	444.531	ANT(2'')-Ia	aminoglycoside antibiotic	antibiotic inactivation	ANT(2'')
38	k141_37905	3	800	798	192	20.5593	mphG	macrolide antibiotic	antibiotic inactivation	macrolide phosphotransferase (MPH)
39	k141_39863	2	634	633	70	9.44942	catB3	phenicol antibiotic	antibiotic inactivation	chloramphenicol acetyltransferase (CAT)
40	k141_60837	599	1495	897	320	30.4837	CARB-8	penam	antibiotic inactivation	CARB beta-lactamase
41	k141_65422	188	1375	1188	2380	171.187	tet(39)	tetracycline antibiotic	antibiotic efflux	major facilitator superfamily (MFS) antibiotic efflux pump
42	k141_65703	1123	2022	900	253	24.0209	mphF	macrolide antibiotic	antibiotic inactivation	macrolide phosphotransferase (MPH)
43	k141_7123	407	1567	1161	160	11.776	tet(X)	glycylcycline; tetracycline antibiotic	antibiotic inactivation	tetracycline inactivation enzyme
44	k141_8180	153	995	843	497	50.3778	OXA-58	carbapenem; cephalosporin; penam	antibiotic inactivation	OXA beta-lactamase
45	k141_845	125	1387	1263	136	9.20124	msr(G)	macrolide antibiotic; streptogramin antibiotic	antibiotic target protection	msr-type ABC-F protein
46	k141_86356	147	1919	1773	276	13.3018	tet(W)	tetracycline antibiotic	antibiotic target protection	tetracycline-resistant ribosomal protection protein
47	k141_89055	104	907	804	126	13.3914	lnuB	lincosamide antibiotic	antibiotic inactivation	lincosamide nucleotidyltransferase (LNU)
48	k141_96042	4253	4618	366	2195	512.465	BRP(MBL)	glycopeptide antibiotic	antibiotic inactivation	Bleomycin resistant protein
49	k141_96042	4622	5434	813	2195	230.704	NDM-1	carbapenem; cephalosporin; cephamycin; penam	antibiotic inactivation	NDM beta-lactamase

## Sheet: WWTP_4_ARG
	Contig_ID	Start	Stop	Contig_Length	Reads	RPKM	Best_Hit_ARO	Drug_Class	Resistance Mechanism	AMR Gene Family
1	k141_112704	353	826	474	73	14.183	dfrA1	diaminopyrimidine antibiotic	antibiotic target replacement	trimethoprim resistant dihydrofolate reductase dfr
2	k141_126677	778	1965	1188	1584	122.79	tet(39)	tetracycline antibiotic	antibiotic efflux	major facilitator superfamily (MFS) antibiotic efflux pump
3	k141_130139	890	1780	891	1582	163.513	mphN	macrolide antibiotic	antibiotic inactivation	macrolide phosphotransferase (MPH)
4	k141_135299	3065	3625	561	1031	169.247	AAC(6')-Ib9	aminoglycoside antibiotic	antibiotic inactivation	AAC(6')
5	k141_135299	2549	2896	348	1031	272.837	qacEdelta1	disinfecting agents and antiseptics	antibiotic efflux	major facilitator superfamily (MFS) antibiotic efflux pump
6	k141_135299	1716	2555	840	1031	113.033	sul1	sulfonamide antibiotic	antibiotic target replacement	sulfonamide resistant sul
7	k141_14209	122	1282	1161	173	13.7226	tet(X)	glycylcycline; tetracycline antibiotic	antibiotic inactivation	tetracycline inactivation enzyme
8	k141_144857	507	1946	1440	474	30.3138	AAC(6')-Ie-APH(2'')-Ia bifunctional protein	aminoglycoside antibiotic	antibiotic inactivation	APH(2''); AAC(6')
9	k141_145679	367	1125	759	221	26.8148	OXA-644	carbapenem; cephalosporin; penam	antibiotic inactivation	OXA beta-lactamase
10	k141_146144	66	1325	1260	563	41.1493	cmlA5	phenicol antibiotic	antibiotic efflux	major facilitator superfamily (MFS) antibiotic efflux pump
11	k141_146144	1646	2098	453	563	114.455	arr-3	rifamycin antibiotic	antibiotic inactivation	rifampin ADP-ribosyltransferase (Arr)
12	k141_150993	1	798	798	72	8.30909	aadA11	aminoglycoside antibiotic	antibiotic inactivation	ANT(3'')
13	k141_157009	1119	2006	888	5791	600.571	mphG	macrolide antibiotic	antibiotic inactivation	macrolide phosphotransferase (MPH)
14	k141_157009	40	864	825	5791	646.433	OXA-347	carbapenem; cephalosporin; penam	antibiotic inactivation	OXA beta-lactamase
15	k141_173595	365	1351	987	779	72.6849	EreD	macrolide antibiotic	antibiotic inactivation	macrolide esterase
16	k141_173597	1080	2066	987	483	45.0665	EreD	macrolide antibiotic	antibiotic inactivation	macrolide esterase
17	k141_178781	3	860	858	340	36.4935	mphG	macrolide antibiotic	antibiotic inactivation	macrolide phosphotransferase (MPH)
18	k141_179205	2834	3664	831	666	73.807	OXA-915	carbapenem; cephalosporin; penam	antibiotic inactivation	OXA beta-lactamase
19	k141_180372	41	940	900	817	83.5995	VEB-9	monobactam; cephalosporin	antibiotic inactivation	VEB beta-lactamase
20	k141_181732	2339	2836	498	694	128.338	dfrG	diaminopyrimidine antibiotic	antibiotic target replacement	trimethoprim resistant dihydrofolate reductase dfr
21	k141_193525	3303	4082	780	6861	810.059	APH(3')-VI	aminoglycoside antibiotic	antibiotic inactivation	APH(3')
22	k141_193525	1213	2025	813	6861	777.179	NDM-1	carbapenem; cephalosporin; cephamycin; penam	antibiotic inactivation	NDM beta-lactamase
23	k141_199165	165	368	204	48	21.6688	rsmA	fluoroquinolone antibiotic; diaminopyrimidine antibiotic; phenicol antibiotic	antibiotic efflux	resistance-nodulation-cell division (RND) antibiotic efflux pump
24	k141_199217	1921	3396	1476	5310	331.308	msrE	macrolide antibiotic; streptogramin antibiotic	antibiotic target protection	msr-type ABC-F protein
25	k141_199217	981	1865	885	5310	552.555	mphE	macrolide antibiotic	antibiotic inactivation	macrolide phosphotransferase (MPH)
26	k141_207184	1888	2691	804	1861	213.164	APH(3'')-Ib	aminoglycoside antibiotic	antibiotic inactivation	APH(3'')
27	k141_207184	1052	1888	837	1861	204.76	APH(6)-Id	aminoglycoside antibiotic	antibiotic inactivation	APH(6)
28	k141_220193	714	1484	771	360	43.0004	ANT(4')-Ib	aminoglycoside antibiotic	antibiotic inactivation	ANT(4')
29	k141_230195	171	1013	843	257	28.0756	OXA-58	carbapenem; cephalosporin; penam	antibiotic inactivation	OXA beta-lactamase
30	k141_231609	319	1182	864	1835	195.59	aadS	aminoglycoside antibiotic	antibiotic inactivation	ANT(6)
31	k141_233856	286	1191	906	86	8.74167	mphA	macrolide antibiotic	antibiotic inactivation	macrolide phosphotransferase (MPH)
32	k141_253841	1895	2710	816	1004	113.31	sul2	sulfonamide antibiotic	antibiotic target replacement	sulfonamide resistant sul
33	k141_261069	1592	2785	1194	337	25.9926	mefF	macrolide antibiotic	antibiotic efflux	major facilitator superfamily (MFS) antibiotic efflux pump
34	k141_261069	17	1474	1458	337	21.2861	msr(G)	macrolide antibiotic; streptogramin antibiotic	antibiotic target protection	msr-type ABC-F protein
35	k141_272300	3794	4597	804	3289	376.731	lnuG	lincosamide antibiotic	antibiotic inactivation	lincosamide nucleotidyltransferase (LNU)
36	k141_275034	3	770	768	46	5.51595	aadA5	aminoglycoside antibiotic	antibiotic inactivation	ANT(3'')
37	k141_276782	80	979	900	147	15.0418	mphF	macrolide antibiotic	antibiotic inactivation	macrolide phosphotransferase (MPH)
38	k141_281077	409	1209	801	464	53.3469	ErmF	macrolide antibiotic; lincosamide antibiotic; streptogramin antibiotic; streptogramin A antibiotic; streptogramin B antibiotic	antibiotic target alteration	Erm 23S ribosomal RNA methyltransferase
39	k141_282029	72266	73078	813	158836	17992.1	OXA-900	carbapenem; cephalosporin; penam	antibiotic inactivation	OXA beta-lactamase
40	k141_295082	847	1584	738	164	20.465	ErmB	macrolide antibiotic; lincosamide antibiotic; streptogramin antibiotic; streptogramin A antibiotic; streptogramin B antibiotic	antibiotic target alteration	Erm 23S ribosomal RNA methyltransferase
41	k141_29554	1	732	732	32	4.0259	ErmT	macrolide antibiotic; lincosamide antibiotic; streptogramin antibiotic; streptogramin A antibiotic; streptogramin B antibiotic	antibiotic target alteration	Erm 23S ribosomal RNA methyltransferase
42	k141_35606	175	1071	897	135	13.8601	CARB-16	penam	antibiotic inactivation	CARB beta-lactamase
43	k141_49020	1	597	597	24	3.70221	catQ	phenicol antibiotic	antibiotic inactivation	chloramphenicol acetyltransferase (CAT)
44	k141_50933	319	1191	873	68	7.1733	CPS-1	carbapenem	antibiotic inactivation	CPS beta-lactamase
45	k141_9149	3	698	696	147	19.4506	AAC(3)-IIc	aminoglycoside antibiotic	antibiotic inactivation	AAC(3)
46	k141_93090	2	697	696	26	3.44024	Erm(36)	macrolide antibiotic; lincosamide antibiotic; streptogramin antibiotic; streptogramin A antibiotic; streptogramin B antibiotic	antibiotic target alteration	Erm 23S ribosomal RNA methyltransferase

## Sheet: WWTP_5_ARG
	Contig_ID	Start	Stop	Contig_Length	Reads	RPKM	Best_Hit_ARO	Drug_Class	Resistance Mechanism	AMR Gene Family
22	k141_304018	2295	2660	366	6544	1820.57	BRP(MBL)	glycopeptide antibiotic	antibiotic inactivation	Bleomycin resistant protein
47	k141_98303	4322	5206	885	9491	1091.98	mphE	macrolide antibiotic	antibiotic inactivation	macrolide phosphotransferase (MPH)
21	k141_304018	1479	2291	813	6544	819.593	NDM-1	carbapenem; cephalosporin; cephamycin; penam	antibiotic inactivation	NDM beta-lactamase
45	k141_78296	5465	6269	805	6128	775.119	lnuG	lincosamide antibiotic	antibiotic inactivation	lincosamide nucleotidyltransferase (LNU)
48	k141_98303	2791	4266	1476	9491	654.743	msrE	macrolide antibiotic; streptogramin antibiotic	antibiotic target protection	msr-type ABC-F protein
17	k141_278750	5000	5737	738	4010	553.265	ErmB	macrolide antibiotic; lincosamide antibiotic; streptogramin antibiotic; streptogramin A antibiotic; streptogramin B antibiotic	antibiotic target alteration	Erm 23S ribosomal RNA methyltransferase
23	k141_308290	7512	7964	453	1978	444.604	dfrG	diaminopyrimidine antibiotic	antibiotic target replacement	trimethoprim resistant dihydrofolate reductase dfr
18	k141_282174	13329	14192	864	2884	339.881	aadS	aminoglycoside antibiotic	antibiotic inactivation	ANT(6)
10	k141_219624	4630	5445	816	2699	336.789	sul2	sulfonamide antibiotic	antibiotic target replacement	sulfonamide resistant sul
31	k141_373318	226	1029	804	2214	280.393	APH(3'')-Ib	aminoglycoside antibiotic	antibiotic inactivation	APH(3'')
32	k141_373318	1029	1865	837	2214	269.338	APH(6)-Id	aminoglycoside antibiotic	antibiotic inactivation	APH(6)
43	k141_72425	3499	4383	885	1932	222.285	mphG	macrolide antibiotic	antibiotic inactivation	macrolide phosphotransferase (MPH)
39	k141_473248	721	1611	891	1749	199.875	mphN	macrolide antibiotic	antibiotic inactivation	macrolide phosphotransferase (MPH)
36	k141_460697	133	987	855	1485	176.85	aadA3	aminoglycoside antibiotic	antibiotic inactivation	ANT(3'')
27	k141_337365	25	864	840	1137	137.825	sul1	sulfonamide antibiotic	antibiotic target replacement	sulfonamide resistant sul
11	k141_219658	1342	2226	885	1110	127.71	mphG	macrolide antibiotic	antibiotic inactivation	macrolide phosphotransferase (MPH)
3	k141_129957	6836	7813	978	1036	107.861	PAU-1	carbapenem; cephalosporin	antibiotic inactivation	PAU beta-lactamase
14	k141_258683	296	1195	900	926	104.764	VEB-9	monobactam; cephalosporin	antibiotic inactivation	VEB beta-lactamase
30	k141_366742	564	1394	831	667	81.7279	OXA-282	carbapenem; cephalosporin; penam	antibiotic inactivation	OXA beta-lactamase
26	k141_33014	1404	2843	1440	1107	78.2764	AAC(6')-Ie-APH(2'')-Ia bifunctional protein	aminoglycoside antibiotic	antibiotic inactivation	APH(2''); AAC(6')
46	k141_88352	2394	3620	1227	837	69.4586	EreD	macrolide antibiotic	antibiotic inactivation	macrolide esterase
40	k141_50367	1834	2760	927	595	65.3556	PER-7	monobactam; carbapenem; cephalosporin; penam; penem	antibiotic inactivation	PER beta-lactamase
13	k141_249247	28	870	843	522	63.0505	OXA-58	carbapenem; cephalosporin; penam	antibiotic inactivation	OXA beta-lactamase
33	k141_411221	1807	2706	900	542	61.32	mphF	macrolide antibiotic	antibiotic inactivation	macrolide phosphotransferase (MPH)
9	k141_215216	916	1704	789	446	57.5577	aadA27	aminoglycoside antibiotic	antibiotic inactivation	ANT(3'')
7	k141_196221	492	1295	804	384	48.6318	lnuB	lincosamide antibiotic	antibiotic inactivation	lincosamide nucleotidyltransferase (LNU)
15	k141_26947	547	1761	1215	502	42.07	cmlA9	phenicol antibiotic	antibiotic efflux	major facilitator superfamily (MFS) antibiotic efflux pump
8	k141_206776	388	1167	780	298	38.9016	ANT(3'')-IIa	aminoglycoside antibiotic	antibiotic inactivation	ANT(3'')
37	k141_473012	176	1342	1167	385	33.592	tet(X)	glycylcycline; tetracycline antibiotic	antibiotic inactivation	tetracycline inactivation enzyme
16	k141_272879	1175	2365	1191	298	25.4771	tet(C)	tetracycline antibiotic	antibiotic efflux	major facilitator superfamily (MFS) antibiotic efflux pump
38	k141_473230	2	580	579	137	24.0928	AAC(6')-Ib9	aminoglycoside antibiotic	antibiotic inactivation	AAC(6')
28	k141_34838	1908	2726	819	192	23.8706	OXA-900	carbapenem; cephalosporin; penam	antibiotic inactivation	OXA beta-lactamase
24	k141_309423	359	832	474	104	22.3409	dfrA1	diaminopyrimidine antibiotic	antibiotic target replacement	trimethoprim resistant dihydrofolate reductase dfr
1	k141_114783	148	948	801	164	20.8476	OXA-10	carbapenem; cephalosporin; penam	antibiotic inactivation	OXA beta-lactamase
25	k141_310726	395	1969	1575	296	19.1362	tet(M)	tetracycline antibiotic	antibiotic target protection	tetracycline-resistant ribosomal protection protein
35	k141_428386	348	1208	861	156	18.4487	AAC(3)-IId	aminoglycoside antibiotic	antibiotic inactivation	AAC(3)
6	k141_186932	286	1056	771	112	14.7914	ANT(4')-Ib	aminoglycoside antibiotic	antibiotic inactivation	ANT(4')
19	k141_286976	291	623	333	48	14.6772	qacL	disinfecting agents and antiseptics	antibiotic efflux	small multidrug resistance (SMR) antibiotic efflux pump
4	k141_159885	313	1137	825	110	13.5764	OXA-347	carbapenem; cephalosporin; penam	antibiotic inactivation	OXA beta-lactamase
34	k141_419245	493	1026	534	67	12.7755	ANT(2'')-Ia	aminoglycoside antibiotic	antibiotic inactivation	ANT(2'')
2	k141_121249	229	888	660	80	12.3422	catQ	phenicol antibiotic	antibiotic inactivation	chloramphenicol acetyltransferase (CAT)
20	k141_29093	90	293	204	22	10.9809	rsmA	fluoroquinolone antibiotic; diaminopyrimidine antibiotic; phenicol antibiotic	antibiotic efflux	resistance-nodulation-cell division (RND) antibiotic efflux pump
29	k141_351541	68	520	453	48	10.7892	arr-3	rifamycin antibiotic	antibiotic inactivation	rifampin ADP-ribosyltransferase (Arr)
12	k141_220747	123	953	831	72	8.8222	OXA-235	carbapenem; cephalosporin; penam	antibiotic inactivation	OXA beta-lactamase
5	k141_183657	261	1157	897	76	8.62713	CARB-16	penam	antibiotic inactivation	CARB beta-lactamase
42	k141_69129	321	1085	765	60	7.98611	cphA5	carbapenem	antibiotic inactivation	CphA beta-lactamase
41	k141_50890	2	733	732	53	7.37242	OXA-496	carbapenem; cephalosporin; penam	antibiotic inactivation	OXA beta-lactamase
44	k141_73675	3	671	669	30	4.56605	aadA5	aminoglycoside antibiotic	antibiotic inactivation	ANT(3'')

## Sheet: WWTP_6_ARG
	Contig_ID	Start	Stop	Contig_Length	Reads	RPKM	Best_Hit_ARO	Drug_Class	Resistance Mechanism	AMR Gene Family
1	k141_105252	124	309	186	14	4.46064	rsmA	fluoroquinolone antibiotic; diaminopyrimidine antibiotic; phenicol antibiotic	antibiotic efflux	resistance-nodulation-cell division (RND) antibiotic efflux pump
2	k141_105760	719	1558	840	820	57.8518	sul1	sulfonamide antibiotic	antibiotic target replacement	sulfonamide resistant sul
3	k141_108621	493649	493834	186	483581	154077	rsmA	fluoroquinolone antibiotic; diaminopyrimidine antibiotic; phenicol antibiotic	antibiotic efflux	resistance-nodulation-cell division (RND) antibiotic efflux pump
4	k141_110150	1379	2233	855	487	33.7555	ANT(3'')-IIa	aminoglycoside antibiotic	antibiotic inactivation	ANT(3'')
5	k141_11851	101	967	867	56	3.82781	AXC-4	carbapenem	antibiotic inactivation	AXC beta-lactamase
6	k141_120155	201	1031	831	563	40.1503	APH(6)-Id	aminoglycoside antibiotic	antibiotic inactivation	APH(6)
7	k141_120155	1037	1840	804	563	41.4987	APH(3'')-Ib	aminoglycoside antibiotic	antibiotic inactivation	APH(3'')
8	k141_140662	477	1340	864	207	14.1984	aadS	aminoglycoside antibiotic	antibiotic inactivation	ANT(6)
9	k141_174045	834	1724	891	399	26.5385	mphN	macrolide antibiotic	antibiotic inactivation	macrolide phosphotransferase (MPH)
10	k141_179601	1537	2763	1227	666	32.1671	EreD	macrolide antibiotic	antibiotic inactivation	macrolide esterase
11	k141_180486	1670	2494	825	59771	4293.57	OXA-644	carbapenem; cephalosporin; penam	antibiotic inactivation	OXA beta-lactamase
12	k141_196051	1	378	378	8	1.25424	Pseudomonas aeruginosa soxR	fluoroquinolone antibiotic; cephalosporin; glycylcycline; penam; tetracycline antibiotic; rifamycin antibiotic; phenicol antibiotic; disinfecting agents and antiseptics	antibiotic target alteration; antibiotic efflux	ATP-binding cassette (ABC) antibiotic efflux pump; major facilitator superfamily (MFS) antibiotic efflux pump; resistance-nodulation-cell division (RND) antibiotic efflux pump
13	k141_202756	687	1574	888	1125	75.0795	mphG	macrolide antibiotic	antibiotic inactivation	macrolide phosphotransferase (MPH)
14	k141_203782	1083	4220	3138	420	7.93192	AxyY	macrolide antibiotic; fluoroquinolone antibiotic; aminoglycoside antibiotic; cephalosporin	antibiotic efflux	resistance-nodulation-cell division (RND) antibiotic efflux pump
15	k141_203782	4227	5402	1176	420	21.1653	AxyX	macrolide antibiotic; fluoroquinolone antibiotic; aminoglycoside antibiotic; cephalosporin	antibiotic efflux	resistance-nodulation-cell division (RND) antibiotic efflux pump
16	k141_208660	366	1250	885	495	33.147	mphG	macrolide antibiotic	antibiotic inactivation	macrolide phosphotransferase (MPH)
17	k141_222952	478	1278	801	286	21.16	OXA-246	carbapenem; cephalosporin; penam	antibiotic inactivation	OXA beta-lactamase
18	k141_231942	281	1180	900	102	6.71645	VEB-9	monobactam; cephalosporin	antibiotic inactivation	VEB beta-lactamase
19	k141_26248	2048	2852	805	354	26.0609	lnuG	lincosamide antibiotic	antibiotic inactivation	lincosamide nucleotidyltransferase (LNU)
20	k141_264020	592	1248	657	145	13.0793	AAC(6')-Ib9	aminoglycoside antibiotic	antibiotic inactivation	AAC(6')
21	k141_264020	91	423	333	145	25.8051	qacE	disinfecting agents and antiseptics	antibiotic efflux	major facilitator superfamily (MFS) antibiotic efflux pump
22	k141_3067	2370	3269	900	1001	65.9134	mphF	macrolide antibiotic	antibiotic inactivation	macrolide phosphotransferase (MPH)
23	k141_49525	3	884	882	382	25.6671	OXA-284	carbapenem; cephalosporin; penam	antibiotic inactivation	OXA beta-lactamase
24	k141_51583	1536	2420	885	3241	217.029	mphE	macrolide antibiotic	antibiotic inactivation	macrolide phosphotransferase (MPH)
25	k141_51583	2476	3951	1476	3241	130.129	msrE	macrolide antibiotic; streptogramin antibiotic	antibiotic target protection	msr-type ABC-F protein
26	k141_55500	2	850	849	176	12.2853	sul4	sulfonamide antibiotic	antibiotic target replacement	sulfonamide resistant sul
27	k141_55944	271	603	333	39	6.94068	qacL	disinfecting agents and antiseptics	antibiotic efflux	small multidrug resistance (SMR) antibiotic efflux pump
28	k141_75193	3	728	726	91	7.42825	NDM-43	carbapenem; cephalosporin; cephamycin; penam	antibiotic inactivation	NDM beta-lactamase
29	k141_79016	357	1796	1440	402	16.5442	AAC(6')-Ie-APH(2'')-Ia bifunctional protein	aminoglycoside antibiotic	antibiotic inactivation	APH(2''); AAC(6')
30	k141_84143	11975	12790	816	5898	428.348	sul2	sulfonamide antibiotic	antibiotic target replacement	sulfonamide resistant sul
31	k141_93536	382	1209	828	197	14.1	OXA-114c	carbapenem; cephalosporin; penam	antibiotic inactivation	OXA beta-lactamase

[truncated: 8 more sheets: WWTP_7_ARG, WWTP1vfdb, WWTP2vdfb, WWTP3vfdb, WWTP4vfdb, WWTP5vfdb, WWTP6vfdb, WWTP7vfdb]
